# Supplementary material for: Outcomes of Liver Transplant Recipients With Acute-on-Chronic Liver Failure Based on EASL-CLIF Consortium Definition: A Single-center Study
Source: PubMed Central journal article supplement — Transplant Direct. 2020 Mar 18;6(4):e544. doi: 10.1097/TXD.0000000000000984 (PMC7145003; doi:10.1097/txd.0000000000000984), 2020-03-18
Supplement: txd-6-e544-s001.pdf [file txd-6-e544-s001.pdf]

### Graft Survival after Liver Transplantation by Number Of Organ Failures

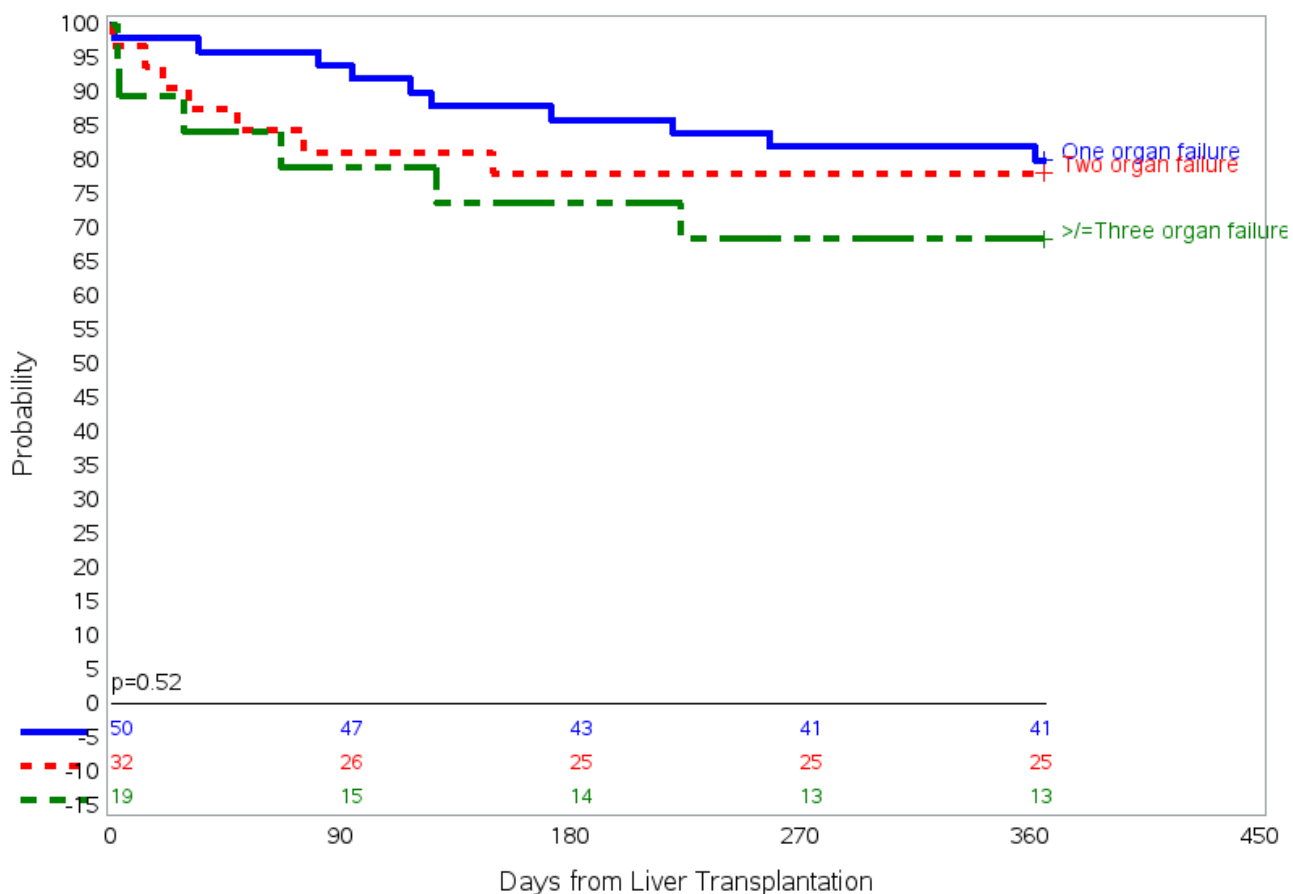

|                                   | 90 days | 180 days | 270 days | 360 days |
|-----------------------------------|---------|----------|----------|----------|
| <b>One Organ Failure</b>          | 94%     | 87%      | 82%      | 82%      |
| <b>Two Organ Failure</b>          | 81%     | 78%      | 78%      | 78%      |
| <b>&gt;/= Three Organ Failure</b> | 79%     | 74%      | 69%      | 69%      |

Figure S1A

### Patient Survival after Liver Transplantation by Number Of Organ Failures

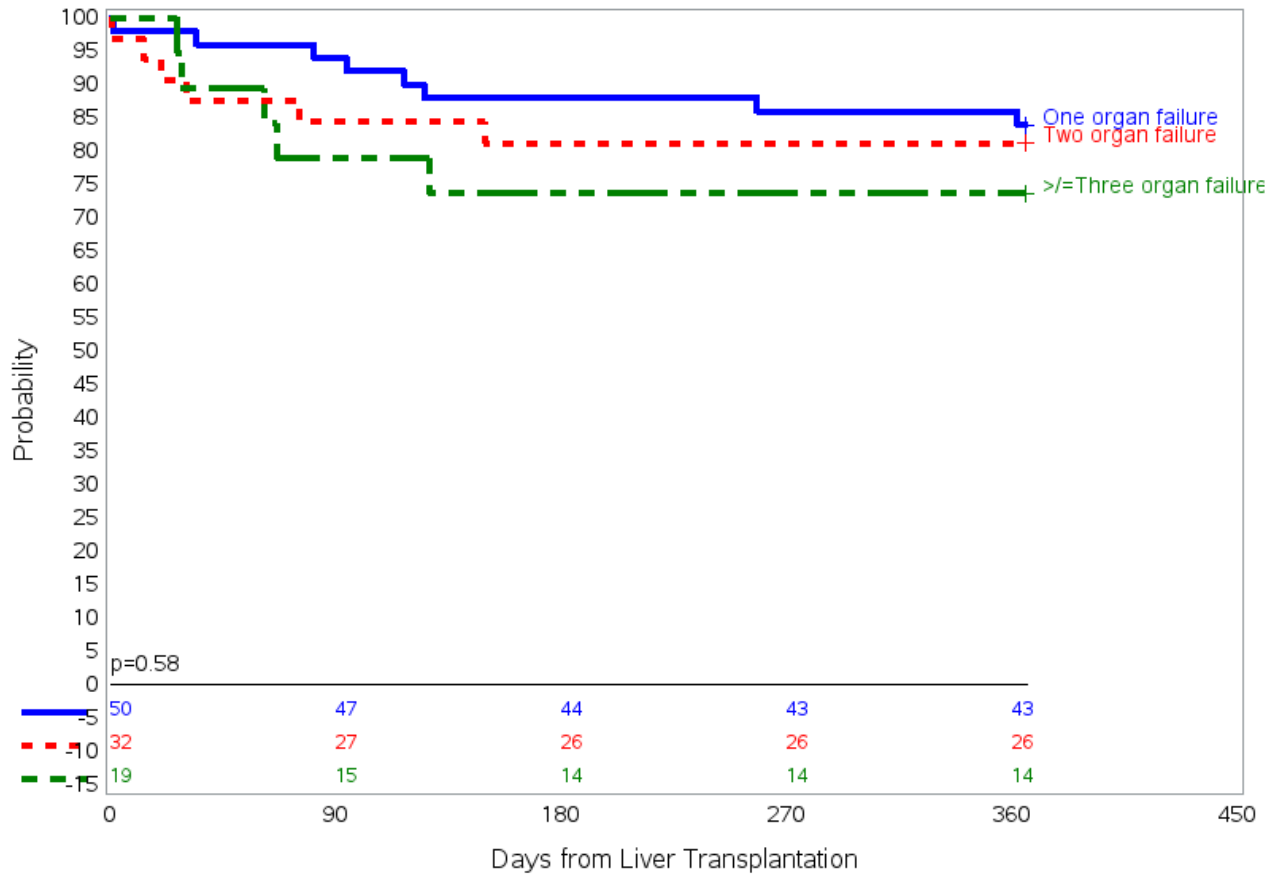

|                                  | 90 days | 180 days | 270 days | 360 days |
|----------------------------------|---------|----------|----------|----------|
| <b>One Organ Failure</b>         | 94%     | 88%      | 87%      | 87%      |
| <b>Two Organ Failure</b>         | 84%     | 81%      | 81%      | 81%      |
| <b>&gt;= Three Organ Failure</b> | 79%     | 74%      | 74%      | 74%      |

Figure S1B

**Figure S1 Cumulative graft survival (death/retransplant) and patient survival (death) by number of organ failures.** (A) One-year graft survival by number of organ failures using Kaplan-Meier survival analysis. (B) One-year patient survival by number of organ failures using Kaplan-Meier survival analysis.

### Graft Survival after Liver Transplantation by MELD change

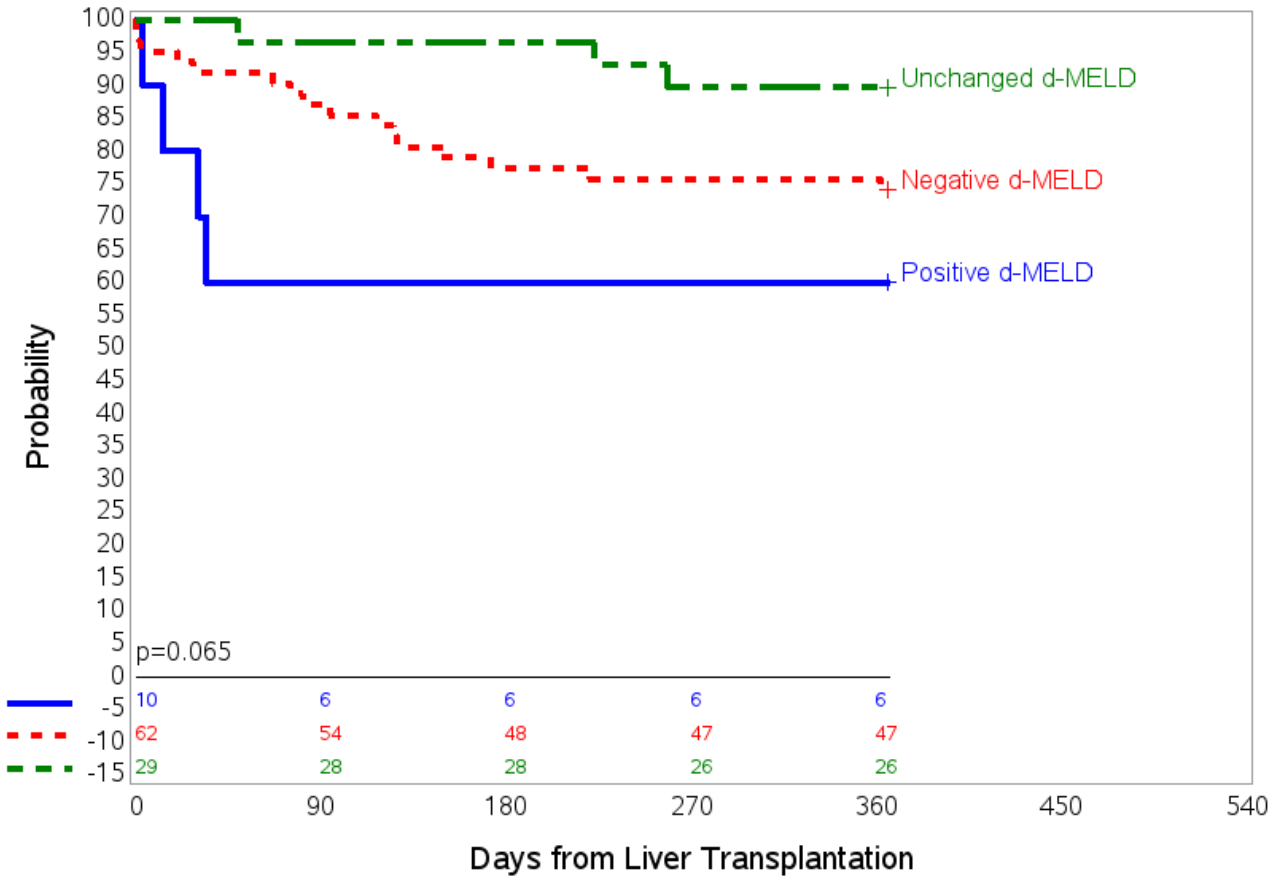

|                         | 90 days | 180 days | 270 days | 360 days |
|-------------------------|---------|----------|----------|----------|
| <b>Negative d-MELD</b>  | 60%     | 60%      | 60%      | 60%      |
| <b>Positive d-MELD</b>  | 87%     | 79%      | 79%      | 79%      |
| <b>Unchanged d-MELD</b> | 97%     | 97%      | 90%      | 90%      |

Figure S2A

### Patient Survival after Liver Transplantation by MELD Change

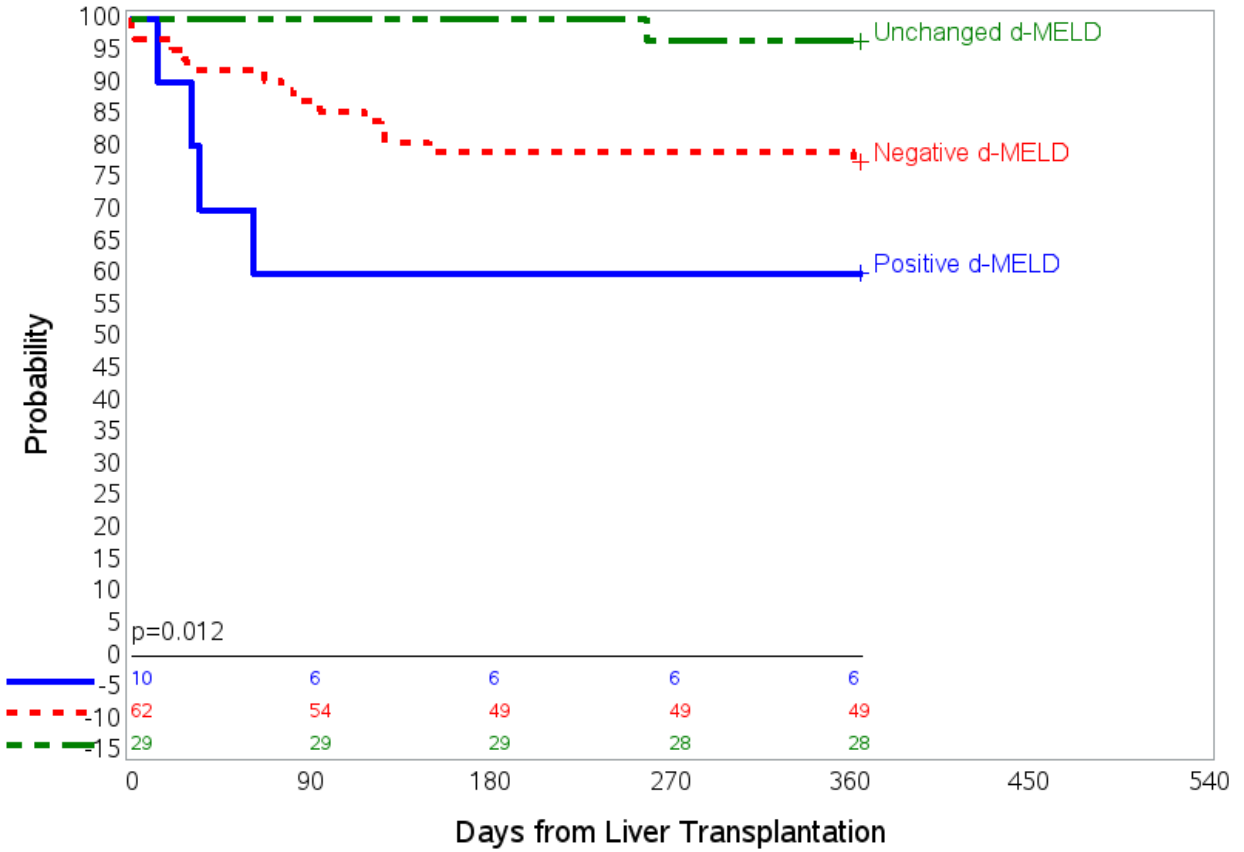

|                         | 90 days | 180 days | 270 days | 360 days |
|-------------------------|---------|----------|----------|----------|
| <b>Negative d-MELD</b>  | 60%     | 60%      | 60%      | 60%      |
| <b>Positive d-MELD</b>  | 87%     | 79%      | 79%      | 79%      |
| <b>Unchanged d-MELD</b> | 100%    | 100%     | 97%      | 97%      |

Figure S2B

**Figure S2 Cumulative graft (death/retransplant) and patient survival (death) in all recipients by MELD change.** (A) One-year graft survival by MELD change using Kaplan-Meier survival analysis. (B) One year patient survival by MELD using Kaplan-Meier survival analysis.

**Table S1. Early (< 90 days) surgical complications/interventions.**

|                                                        | <b>All patients<br/>(N= 690),<br/>n(%)</b> | <b>No ACLF<br/>(N=101),<br/>n(%)</b> | <b>ACLF<br/>(N=589), n(%)</b> | <b>P-value</b> |
|--------------------------------------------------------|--------------------------------------------|--------------------------------------|-------------------------------|----------------|
| <b>Intra-abdominal<br/>bleeding</b>                    | 41(5.9)                                    | 33(5.6)                              | 8(7.9)                        | 0.36           |
| <b>HAT/HAS</b>                                         | 4(0.6)                                     | 3(0.5)                               | 1(1)                          | 0.47           |
| <b>Bile duct<br/>leak/revision</b>                     | 33(4.8)                                    | 30(5.1)                              | 3(3)                          | 0.46           |
| <b>Primary<br/>nonfunction</b>                         | 1(0.1)                                     | 0(0)                                 | 1(1)                          | 0.15           |
| <b>Re-LT (&lt;90 days)</b>                             | 5(0.7)                                     | 4(0.7)                               | 1(1.0)                        | 0.55           |
| <b>Portal vein<br/>thrombosis</b>                      | 1(0.1)                                     | 1(0.2)                               | 0(0)                          | 1.00           |
| <b>Infectious<br/>complications</b>                    | 12(1.7)                                    | 7(1.2)                               | 5(5.0)                        | 0.02           |
| <b>Bowel perforation</b>                               | 9(1.3)                                     | 6(1)                                 | 3(3)                          | 0.13           |
| <b>Bowel obstruction</b>                               | 3(0.4)                                     | 1(0.2)                               | 2(2)                          | 0.06           |
| <b>Abdominal<br/>compartment<br/>syndrome</b>          | 1(0.1)                                     | 1(0.2)                               | 0(0)                          | 1.00           |
| <b>Surgical re-<br/>exploration<br/>within 90 days</b> | 113(16.4)                                  | 86(14.6)                             | 27(26.7)                      | 0.002          |

Abbreviations:

ACLF: acute-on-chronic liver failure; HAT: hepatic artery thrombosis; HAS: hepatic artery stenosis; LT: liver transplant

**Table S2. Etiology of graft loss at 1 year in the ACLF groups and the non-ACLF groups**

| Etiology of graft loss | No ACLF<br>N=589 | ACLF<br>N=101 |
|------------------------|------------------|---------------|
| Graft failure          | 3 (0.5)          | 0 (0)         |
| CHF                    | 0 (0)            | 3 (2.97)      |
| AMI                    | 11 (1.87)        | 4 (3.96)      |
| Cardiac arrest         | 0 (0)            | 1 (0.99)      |
| Sepsis                 | 16 (2.72)        | 6 (5.94)      |
| Malignancy             | 4 (0.68)         | 1 (0.99)      |
| Unknown                | 5 (0.85)         | 2 (1.98)      |
| Chronic Rejection      | 1 (0.17)         | 0 (0)         |
| GI bleeding            | 1 (0.17)         | 1 (0.99)      |
| PE                     | 1 (0.17)         | 0 (0)         |
| Recurrent HCV          | 1 (0.17)         | 0 (0)         |
| Respiratory failure    | 5 (0.85)         | 1 (0.99)      |
| CVA                    | 1 (0.17)         | 0 (0)         |
| Suicide                | 1 (0.17)         | 0 (0)         |
| Retransplant           | 32 (5.43)        | 7 (6.93)      |

Abbreviations:

ACLF: acute-on-chronic liver failure; AMI: acute myocardial infarction; CHF: congestive heart failure; CVA: cerebrovascular accident; GI: gastrointestinal; HCV: hepatitis C virus
